# Supplementary material
Source: Royal Society of Chemistry journal article supplement (doi:10.1039/d5ta09847e)
Supplement: d5ta09847e1.pdf [file d5ta09847e1.pdf]

# Journal Name

ARTICLE TYPE

Cite this: DOI: 00.0000/xxxxxxxxxx

## High cyclic reversibility in Eutectic Lithium Calcium Anodes characterised by Electron Microscopy<sup>†</sup>

Ed Darnbrough,<sup>\*a</sup> Sreejith Olakkil Veedu<sup>a</sup>, Zhuojun Hou<sup>a</sup>, Myra Ng<sup>a</sup>, Jack Aspinall<sup>a</sup>, Chris Grovenor<sup>a</sup>, Peter D. Nellist<sup>a</sup>, David E.J. Armstrong<sup>a</sup>

## 1 Supplementary Figures

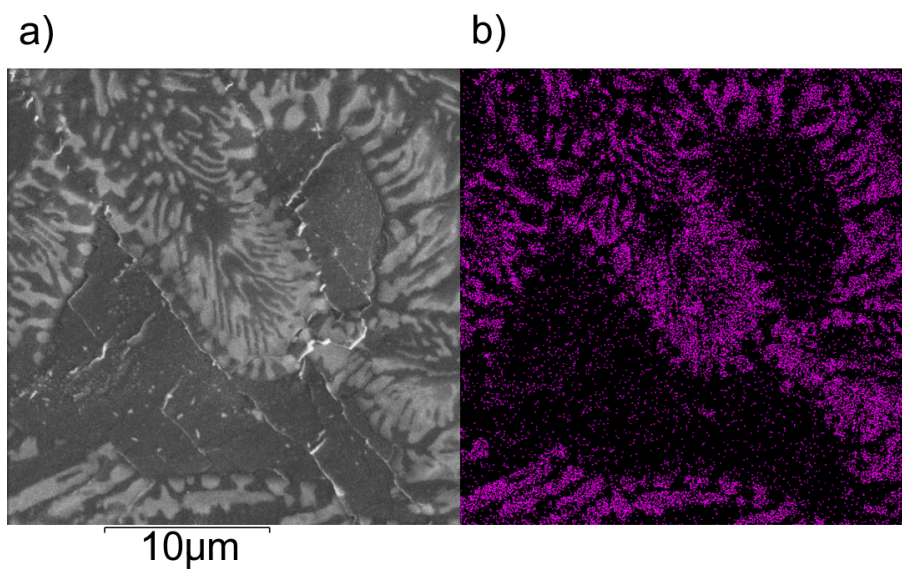

Fig. 1 a) SEM and b) EDX images of the calcium (light-SEM and purple-EDX) distribution between the phases in the LREM.

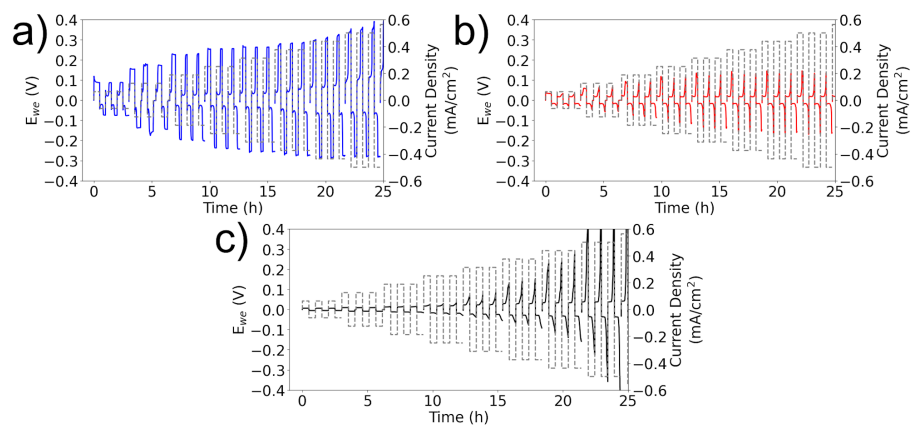

Fig. 2 Comparison of cell potential with increasing current (dashed line) focusing on the first 25 hrs of the tests. a-b) LREM symmetric cells with LiPF<sub>6</sub> and LiTFSI, respectively. c) lithium symmetric cell with LiTFSI.

### 1.1 Calculation of theoretical capacity.

Theoretical capacity of an anode:  $\text{Electrode Mass} \times 58.7\% \times \text{Avagadro's Number} \times e / \text{Atomic mass Li} \times \text{Area reference for } 1.1 \text{ mA cm}^2$   
cycling is Ng cell AF or AG

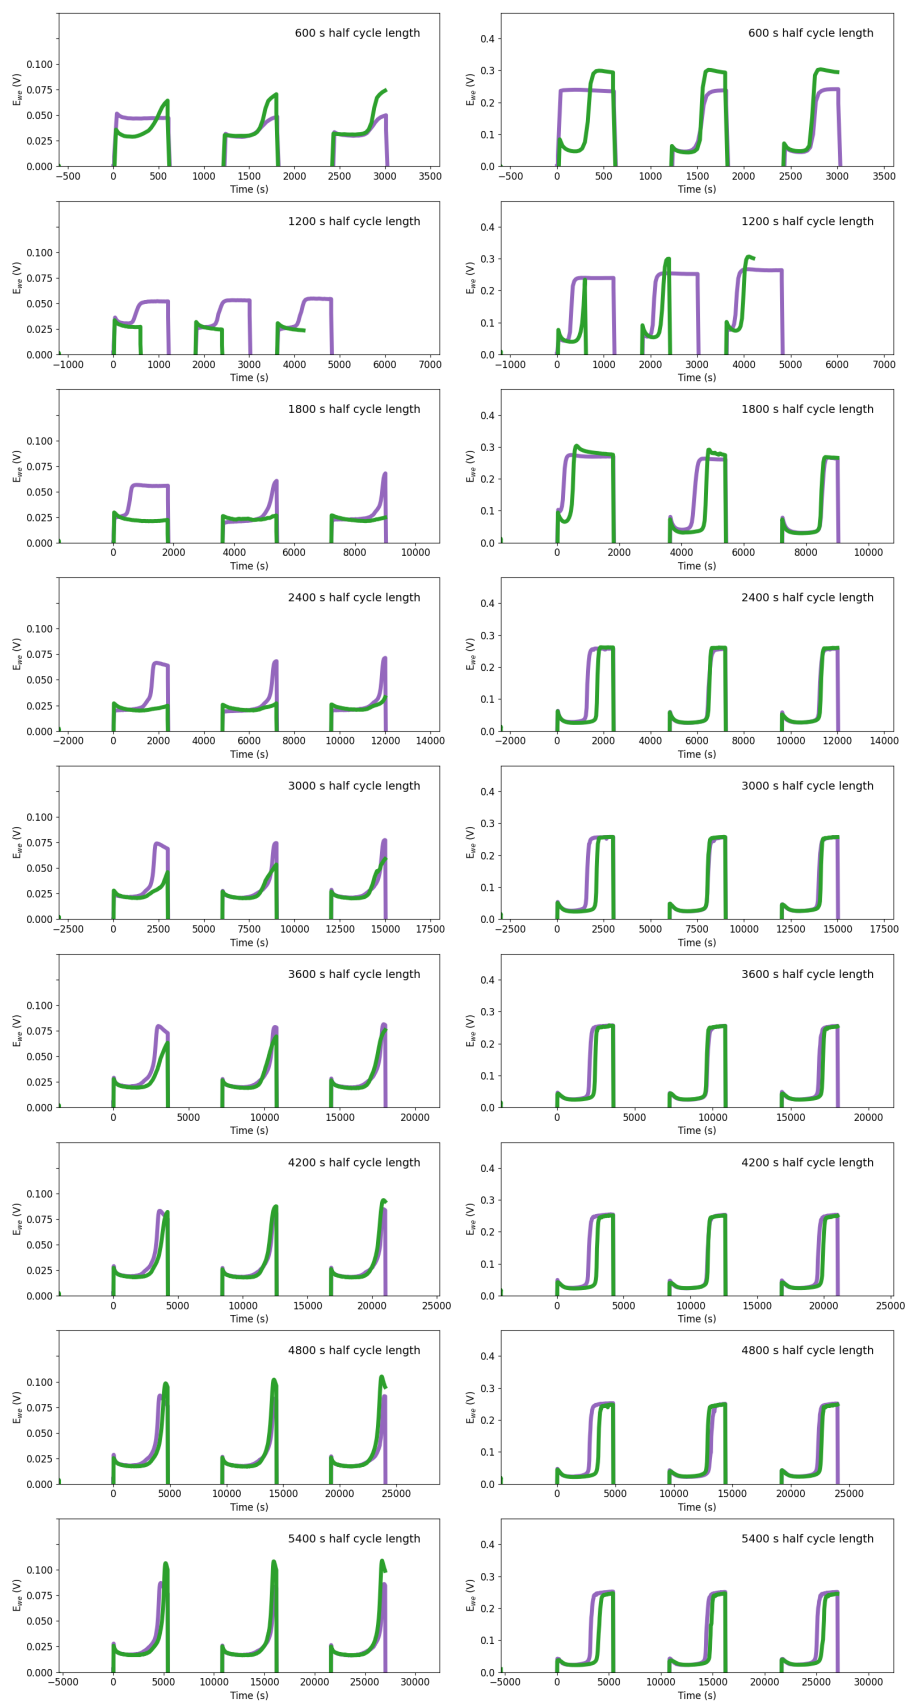

Fig. 3 Comparison of increasing half cycle time LREM symmetric cells in the two electrolytes, left LiTFSI and right LiPF<sub>6</sub> (note that the voltage scale for LiPF<sub>6</sub> is 4 times larger than LiTFSI). Electrode A (purple) is the response first half of each cycle and Electrode B (green) is the second half cycle inverted and shifted for easy comparison.

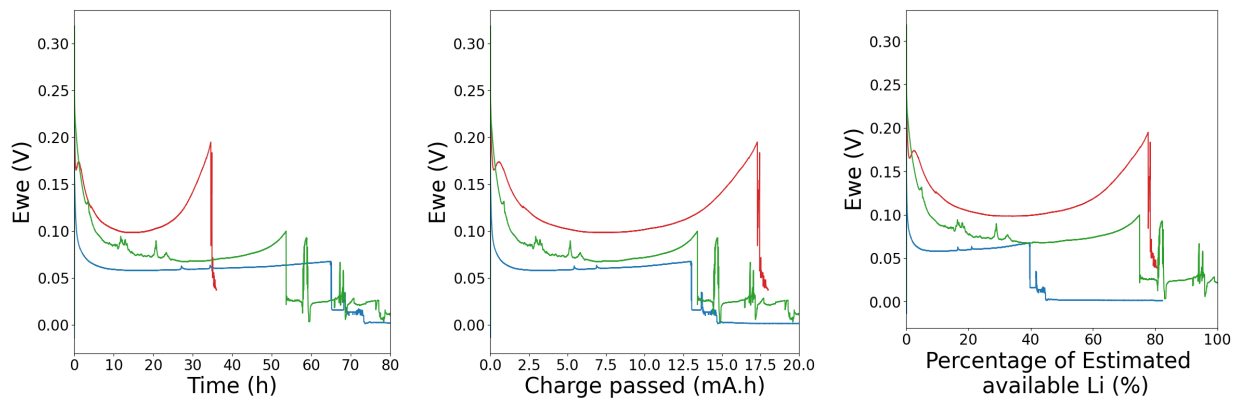

Fig. 4 Deep strip potential profile for 0.5 mA (red), 0.2 mA (green) and 0.25 mA (blue) with different x-axis to illustrate that the increase in potential during a long strip is related to the available lithium content in the electrode as well as the current.

a)

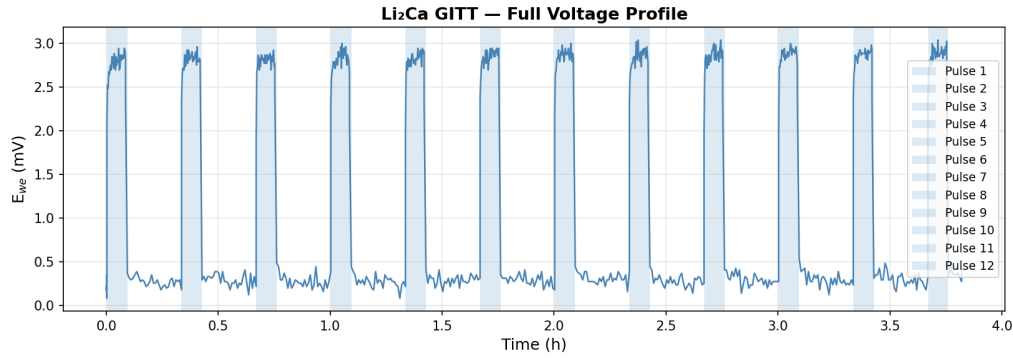

b)

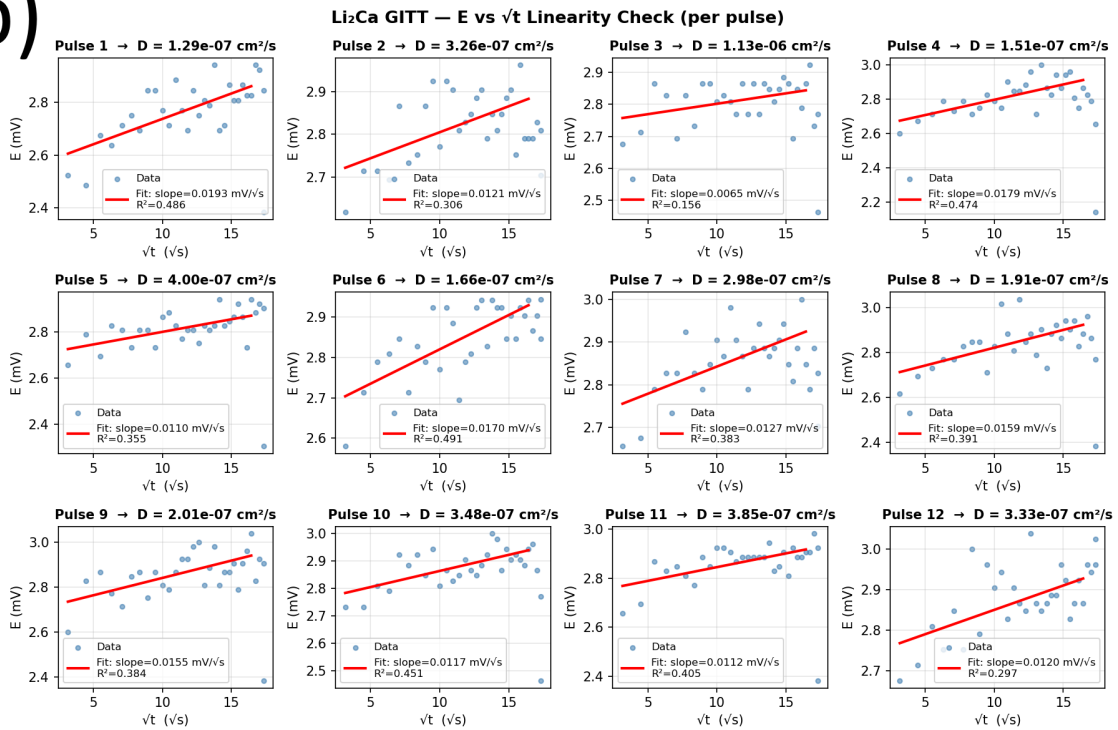

Fig. 5 a) the potential response against time for a solid-state Li<sub>2</sub>Ca anode cast on to a stainless-steel current collector, LiTFSI electrolyte and an InLi/In counter electrode as described in Ref<sup>2</sup>. A pulse current density of 10 mA/g was applied for 300 s pulses, with 900 s of rest. The polarisation of the counter electrode is negligible compared to the polarisation of the working electrode. b) the fitted slope for each pulse.

Fig. 6 GITT diffusion coefficient results for  $\text{Li}_2\text{Ca}$  vs  $\text{Li}/\text{Li}^+$ .

| Pulse | $\Delta E_{\tau}$ (mV) | $\Delta E_s$ (mV) | Slope (mV/ $\sqrt{s}$ ) | $R^2$ | $D_{\text{slope}}$ ( $\text{cm}^2/\text{s}$ ) | $D_{\text{ratio}}$ ( $\text{cm}^2/\text{s}$ ) |
|-------|------------------------|-------------------|-------------------------|-------|-----------------------------------------------|-----------------------------------------------|
| 1     | 2.304                  | 0.180             | 0.01933                 | 0.486 | 1.286e-07                                     | 3.133e-11                                     |
| 2     | 2.529                  | 0.107             | 0.01215                 | 0.306 | 3.256e-07                                     | 9.149e-12                                     |
| 3     | 2.250                  | 0.044             | 0.00652                 | 0.156 | 1.131e-06                                     | 1.983e-12                                     |
| 4     | 1.758                  | 0.127             | 0.01786                 | 0.474 | 1.507e-07                                     | 2.694e-11                                     |
| 5     | 2.090                  | 0.069             | 0.01096                 | 0.355 | 4.003e-07                                     | 5.536e-12                                     |
| 6     | 2.636                  | 0.027             | 0.01702                 | 0.491 | 1.659e-07                                     | 5.264e-13                                     |
| 7     | 2.529                  | 0.124             | 0.01271                 | 0.383 | 2.977e-07                                     | 1.225e-11                                     |
| 8     | 1.998                  | 0.121             | 0.01587                 | 0.391 | 1.909e-07                                     | 1.890e-11                                     |
| 9     | 2.132                  | 0.030             | 0.01546                 | 0.384 | 2.010e-07                                     | 9.989e-13                                     |
| 10    | 2.193                  | 0.005             | 0.01175                 | 0.451 | 3.481e-07                                     | 3.041e-14                                     |
| 11    | 2.151                  | 0.056             | 0.01117                 | 0.405 | 3.851e-07                                     | 3.438e-12                                     |
| 12    | 2.697                  | 0.014             | 0.01202                 | 0.297 | 3.327e-07                                     | 1.443e-13                                     |

  

|                                    |                                               |
|------------------------------------|-----------------------------------------------|
| Mass loading                       | 3.01 mg                                       |
| Density ( $\text{Li}_2\text{Ca}$ ) | 1.37 $\text{g}/\text{cm}^3$                   |
| Molar volume $V_M$                 | 39.39 $\text{cm}^3/\text{mol}$                |
| Current $I$                        | 30.1 $\mu\text{A}$                            |
| Area $S$                           | 2.0 $\text{cm}^2$                             |
| Geometric mean $D_{\text{slope}}$  | $2.809 \times 10^{-7} \text{ cm}^2/\text{s}$  |
| Arithmetic mean $D_{\text{slope}}$ | $3.381 \times 10^{-7} \text{ cm}^2/\text{s}$  |
| Geometric mean $D_{\text{ratio}}$  | $2.708 \times 10^{-12} \text{ cm}^2/\text{s}$ |
| Arithmetic mean $D_{\text{ratio}}$ | $9.268 \times 10^{-12} \text{ cm}^2/\text{s}$ |

Fig. 7 The poor  $R^2$  values of the slope fits in figure 5b) are illustrative of a quick transformation to a two phase system in place of a concentration gradient produced over a longer duration. This results in a smaller slope measured diffusion coefficient, therefore the ratio method is preferred as it is not biased by the two phase effect. It should be noted that a geometric surface area from the size of the sample was used in the calculation.
